# Supplementary material for: Transcriptional and post-transcriptional regulation of PenA β-lactamase in acquired Burkholderia pseudomallei β-lactam resistance
Source: PubMed Central journal article supplement (PMC6045580; doi:10.1038/s41598-018-28843-7), 2018-07-13
Supplement: 41598_2018_28843_MOESM1_ESM.pdf [file 41598_2018_28843_MOESM1_ESM.pdf]

## Supplementary Materials

# Transcriptional and post-transcriptional regulation of PenA $\beta$ -lactamase in acquired *Burkholderia pseudomallei* $\beta$ -lactam resistance

Sunisa Chirakul, Michael H. Norris, Nawarat Somprasong, Sirawit Pagdepanichkit, Linnell B. Randall, James F. Shirley, Bradley R. Borlee, Olga Lomovskaya, Apichai Tuanyok, Herbert P. Schweizer

**Supplementary Table S1.** Primers used in this study.

**Supplementary Figure S1.** Genomic organization of the *B. pseudomallei*, *B. mallei* and *B. thailandensis nlpD1* and *penA* loci and their features.

**Supplementary Figure S2.** Genomic organization of *B. pseudomallei nlpD1* and *nlpD2*.

**Supplementary Figure S3.** Domain organization of *E. coli* and *B. pseudomallei* NlpD.

**Supplementary Figure S4.** Alignment of LytM domains.

**Supplementary Figure S5.** Full size agarose gel of RT-PCR analysis of *nlpD1* and *penA* expression.

**Supplementary Figure S6.** Full size picture of *E. coli* strain on agar plate containing  $\beta$ -galactosidase indicator.

**Table S1. Primers used in this study.**

| Primer                                                                   | Sequence <sup>a,b,c</sup>                                                                  | Source     |
|--------------------------------------------------------------------------|--------------------------------------------------------------------------------------------|------------|
| <b>β-galactosidase (<i>lacZ</i>) transcriptional fusion construction</b> |                                                                                            |            |
| 2990                                                                     | 5'-TGACGAGAGCTGATACaCTAGCGGGCCG                                                            | This study |
| 2991                                                                     | 5'-CGGCCCGCTAGtGTATCAGCTCTCGTCA                                                            | This study |
| 2992                                                                     | 5'-CGCACGCCGCGtGCCCGATTTCG                                                                 | This study |
| 2993                                                                     | 5'-GCGAATCGGGCaCGCGGCGTGCG                                                                 | This study |
| 2978                                                                     | 5'-GCGAGCA <b>AAGCTT</b> GGCGCAACGGAGA ( <i>HindIII</i> )                                  | This study |
| 2994                                                                     | 5'-AAGCCC <b>ACTAGT</b> GTCAATCCGATGC ( <i>SpeI</i> )                                      | This study |
| 3004                                                                     | 5'-AAGCCC <b>ACTAGT</b> GAAACGTTCCAGCCCGGC ( <i>SpeI</i> )                                 | This study |
| 3005                                                                     | 5'-GCGAGCA <b>AAGCTT</b> GGCGCAACGGAGAATGAT ( <i>HindIII</i> )                             | This study |
| 3006                                                                     | 5'-AGGGCTAGCGGcGTGCCCGCCGC                                                                 | This study |
| 3007                                                                     | 5'-GCGGCGGGCACgCCGCTAGCCCT                                                                 | This study |
| <b>Primers for markerless chromosomal <i>penA</i> deletion</b>           |                                                                                            |            |
| 2917                                                                     | 5'-CATCGGGTCGTCCAGGAAACGAAG                                                                | This study |
| 2918                                                                     | 5'- <u>CCGAACGGCGCGCGGCCGCGCGCCAGGC</u><br><u>GGATCGCGGGAAGATTGAACGGGCGCGCAAT</u>          | This study |
| 2919                                                                     | 5'- <u>ATTGCGGCCCGTTCAATCTTCCC</u> <u>GCGATCCGC</u><br><u>CTGGCGCGCGCGGCCGCGCGCCGTTCCG</u> | This study |
| 2920                                                                     | 5'-CGACGACGGGCTCGAAAAACAGG                                                                 | This study |
| <b>RT-PCR primers</b>                                                    |                                                                                            |            |
| 2293                                                                     | 5'-CGAGCAGCCGGTGACGCT                                                                      | This study |
| 2997                                                                     | 5'-GAGATCGACCGCAGTGTC                                                                      | This study |
| 2998                                                                     | 5'-CGTCGCGCCGCACCTCGA                                                                      | This study |
| 2999                                                                     | 5'-GAAACGTTCCAGCCCGGC                                                                      | This study |
| 3001                                                                     | 5'-TGCTCGTCGCAGCCATTTCC                                                                    | This study |
| 3003                                                                     | 5'-TCGCCGCGCACAGCTCGG                                                                      | This study |
| <b>Real time PCR primers</b>                                             |                                                                                            |            |
| Bp23S_F                                                                  | 5'-GTAGACCCGAAACCAGGTGA                                                                    | 1          |
| Bp23S_R                                                                  | 5'-CACCCCTATCCACAGCTCAT                                                                    | 1          |
| 2853                                                                     | 5'-TTCCCGTTCTGCAGCAC ( <i>penA</i> )                                                       | This study |
| 2854                                                                     | 5'-CGAATAGCGGATGAGATCGC ( <i>penA</i> )                                                    | This study |
| 3008                                                                     | 5'-GATTTTCTGACCGCTTACGC ( <i>nlpD1</i> )                                                   | This study |
| 3009                                                                     | 5'-GCATCGGATTGACGGGCTTG ( <i>nlpD1</i> )                                                   | This study |

<sup>a</sup>Lower case type indicates an introduced nucleotide change.

<sup>b</sup>Bold indicates a newly generated restriction enzyme cleavage site.

<sup>c</sup>Underline indicates a homologous splicing region.

a

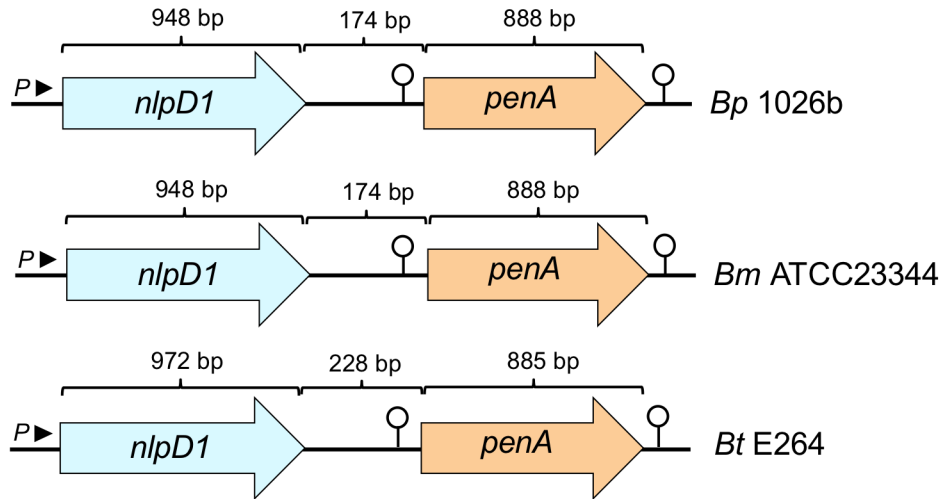

b

|              |                                                                     |
|--------------|---------------------------------------------------------------------|
| E264         | GCCACAAATTTGCACGCATTTCATGTGACGAGAGCTGATACGCTTGGCGGACCGCGATATCGGGGGC |
| E166K1-F1    | GCCACAAATTTGCACGCATTTCATGTGACGAGAGCTGATACACTTGGCGACCGCGATATCGGGGGC  |
| 1026b        | GCCACAAATTCGCACGCCTCCTGTGACGAGAGCTGATACGCTAGCGGGCCCGGATGCCGGGTGC    |
| Bp1651       | GCCACAAATTCGCACGCCTCCTGTGACGAGAGCTGATACACTAGCGGGCCCGGATGCCGGGTGC    |
| Bm ATCC23344 | GCCACAAATTCGCACGCCTCCTGTGACGAGAGCTGATACGCTAGCGGGCCCGGATGCCGGGTGC    |

  

|              |                                                                  |
|--------------|------------------------------------------------------------------|
| E264         | GCGGCAACCGCG-GCCCGATGCGCGTCCGTTCAATCTTCGGCTATTCTCGCTTTCGGCTCTATG |
| E166K1-F1    | GCGGCAACCGCG-GCCCGATGCGCGTCCGTTCAATCTTCGGCTATTCTCGCTTTCGGCTCTATG |
| 1026b        | GCGCAGCCCGCGGCGCCGATTCGCGCCCGTTCAATCTTCCCGGATCCGCCTG-----ATG     |
| Bp1651       | GCGCAGCCCGCGGCGCCGATTCGCGCCCGTTCAATCTTCCCGGATCCGCCTG-----ATG     |
| Bm ATCC23344 | GCGCAGCCCGCGGCGCCGATTCGCGCCCGTTCAATCTTCCCGGATCCGCCTG-----ATG     |

M

c

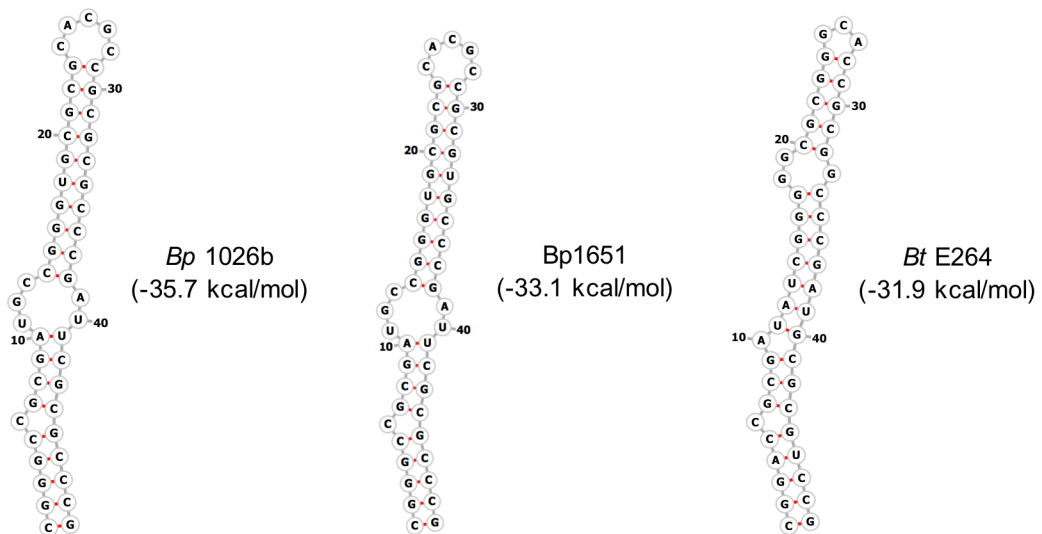

**Figure S1. Genomic organization of the *B. pseudomallei*, *B. mallei* and *B. thailandensis nlpD1* and *penA* loci and their features.** **a.** In each species the *nlpD1* and *penA* genes are predicted to form an operon that is located on chromosome 2. In *B. pseudomallei* strain 1026b and *B. mallei* strain ATCC23344 the *nlpD1* and *penA* genes and their intergenic region are identical in size and over the encompassing 2,010 bp exhibit 99% sequence identity (2,002 of 2,010 bp) with no gaps. Lollipop structures indicate transcriptional terminators. Sequence data were retrieved from the *Burkholderia* Genome database (<http://www.burkholderia.com>)<sup>2</sup>. Although closely related, the *B. thailandensis nlpD1* and *penA* genes and their intergenic region differ from *B. pseudomallei* and *B. mallei* in size and sequence similarity (86% identity over 2,085 bp with numerous gaps). **b.** Main features of the *penA* 5' untranslated regions of ceftazidime susceptible (1026b) and resistant (Bp1651) *B. pseudomallei* clinical strains, ceftazidime susceptible (E264) and resistant (E166K1-F1) *B. thailandensis* strains and the ceftazidime susceptible *B. mallei* ATCC23344 type strain. The G to A mutation resulting in a constitutive *penA* promoter in ceftazidime resistant clinical *B. pseudomallei* strain Bp1651 and laboratory-selected ceftazidime resistant *B. thailandensis* strain E166K1-F1 is highlighted in red. As previously hypothesized, the G to A transition changed a putative weak 5'-TACGCT  $\sigma_{70}$  promoter -10 sequence that is present in CAZ susceptible strains to 5'-TACACT (underlined), a sequence that is closer to a  $\sigma_{70}$  promoter -10 consensus sequence (5'-TATAAT)<sup>3,4</sup>. Nucleotides forming a stem-loop structure, i.e. a transcriptional terminator, are boxed in black. Nucleotides that differ between strains are highlighted in turquoise. **c.** Structures of the predicted terminator sequences in the *penA* 5' untranslated regions of *B. pseudomallei* (Bp) 1026b and *B. thailandensis* (Bt) E264. The structures differ because of the nucleotide sequence differences in this region, which includes a one-nucleotide deletion (see panel **b**). The RNA secondary structure plots were generated and free energies calculated using the RNAfold WebServer (<http://rna.tbi.univie.ac.at/cgi-bin/RNAWebSuite/RNAfold.cgi>). The secondary structure numbering refers to the location of the respective bases in the 49 (Bp) and 48 (Bt) nucleotide terminator sequences. The sequence (see panel **b**) and thus structure of the *B. mallei* ATCC23344 terminator is the same as that shown for *B. pseudomallei* Bp1651. Numbers in parentheses are free energy values for the respective stem-loop structures.

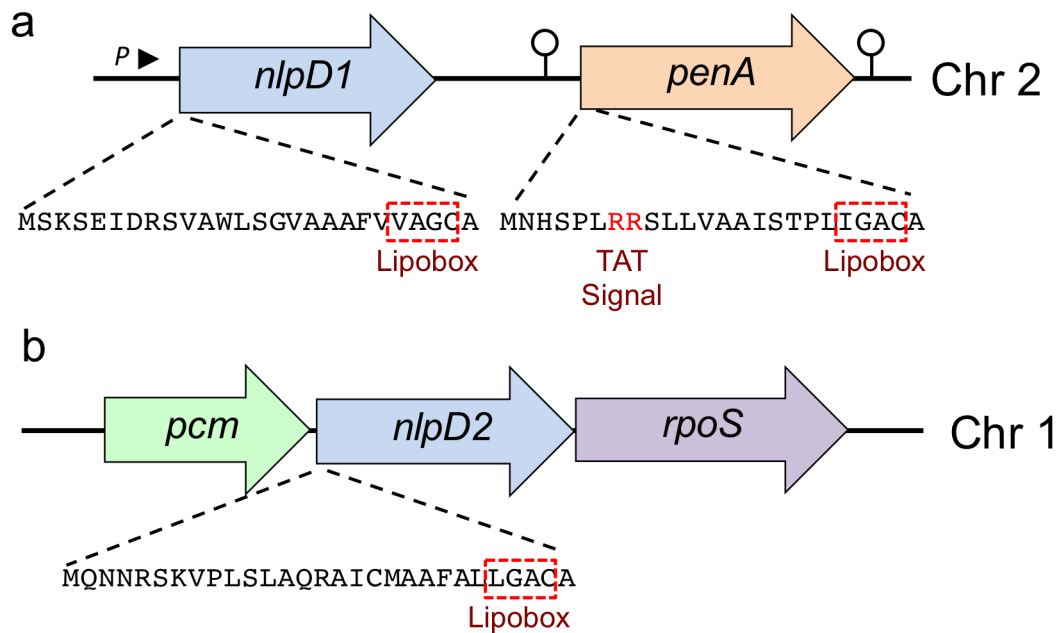

**Figure S2. Genomic organization of *B. pseudomallei* *nlpD1* and *nlpD2*.** **a.** The *nlpD1* and *penA* genes form an operon that is located on chromosome 2. The *penA* gene encodes a protein with twin arginine transport (TAT) signal that directs its export via the TAT system<sup>5</sup>. During export PenA is triacylated at the conserved lipobox cysteine<sup>6</sup>. The *nlpD1* gene encodes a protein with a lipobox in the amino-terminal sequences and is thus likely a lipoprotein in its mature form. NlpD1 is possibly a TAT secreted protein because in some instances a single arginine, in this case R8, is sufficient for TAT secretion<sup>5</sup>. **b.** The *nlpD2* gene is located on chromosome 1 and organized in the same genetic context and transcriptional organization as the *E. coli* *nlpD* gene. It is upstream of *rpoS* that encodes a stationary phase sigma factor and downstream of *pcm* that codes for a protein-L-aspartate O-methyl transferase. The *nlpD2* gene encodes a protein with a lipobox in the amino-terminal sequences and, similar to NlpD1, is likely a lipoprotein in its mature form. PenA, NlpD1 and NlpD2 are predicted to be located in the outer membrane because the three proteins contain alanine rather than aspartic acid in the +2 position of the signal peptidase II cleavage site, a constellation that predicts localization to the outer rather than inner membrane<sup>7,8</sup>. Lollipop structures indicate transcriptional terminators.

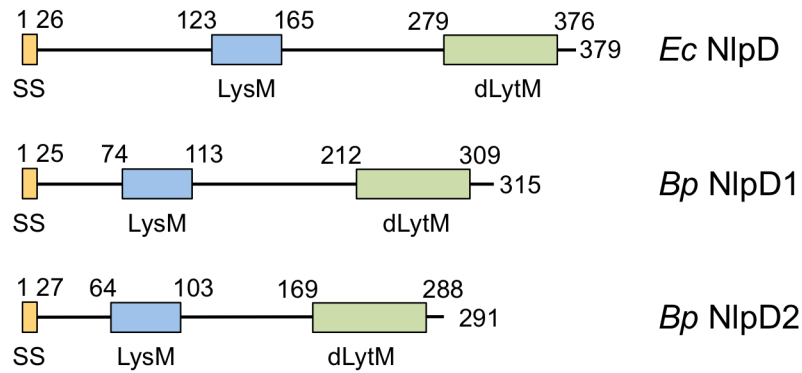

**Figure S3. Domain organization of *E. coli* and *B. pseudomallei* NlpD.** Indicated are lipoprotein signal sequences (SS), the lysine motif (LysM) that is common in cell envelope-associated proteins and involved in peptidoglycan-binding activity; and 3) the degenerate LytM (dLytM) domain that is required for the protein's cell wall hydrolytic amidase activating activity<sup>9</sup>. Domain assignments and coordinates for *E. coli* NlpD were adapted from Tsang et al.<sup>9</sup>.

```

Bp NlpD1 198 PAKGAVVETF--QPGR---NRGIRIVGRAGDPVRAAASGRVVMYAGTGLNG
Bp NlpD2 177 PVRGALLNTF--DDSK---NKGINIGGPAGEAVKAAADGRVVYAGNGLRG
Ec NlpD 263 PTEGKVIETFGASEGG---NKGIDIAGSKGQAI IATADGRVVYAGNALRG
Ec EnvC 301 PVRGPTLHRYGEQLQGELRWKCMVIGASEGTEVKAIADGRVILA-DWLOG
Sa LytM 198 LTSRKQLQPYGQYHGGG-AHYGVHDYAMPENSPVYSLTDGTVVQAGWSNYG

Bp NlpD1 243 YGTLILVQHNA-DFLTAYAHNRKVLVKTGDVVQOGEQIAEMGTGDSTRAG
Bp NlpD2 222 YGNLIIIIKHDA-TYLTAYAHNRALMVKEGDAVTKCOKIAEMGNSSDRV-
Ec NlpD 310 YGNLIIIIKHND-DYLSAYAHNDTMLVREQQEHVKAGOKIATMGSTG-TSST
Ec EnvC 350 YGLVVVVEHGK-GDMSLYGYNQHSALVSVGSQVRACQPIALVSGSGGQGRP
Sa LytM 247 GGNQVTIKEANSNNYQWYMHNNRHLTHVSAGDKVHKAGDQIAYSHGSTGNSTAP

Bp NlpD1 292 ML-FEVRHRDGK----PVNHMPYHLASRHOQG*
Bp NlpD2 270 MLHFHEVRRHOQK----PVDHPLKHYLPPQ*
Ec NlpD 358 RLHFHEIRYKHGK----SVNHPLRHYLPQR*
Ec EnvC 399 SLYFHEIRRHOQHQ----AVNHPQPHWLGR*
Sa LytM 297 HVHHFHORMSGHGIGNQYAVHDEHTSYLHQSR*

```

**Figure S4. Alignment of LytM domains.** The LytM domains are of *S. aureus* LytM, *E. coli* EnvC and NlpD, and *B. pseudomallei* NlpD1 and NlpD2 were aligned using CLUSTAL multiple sequence alignment by MUSCLE (3.8) on the European Bioinformatics Institute webserver at <https://www.ebi.ac.uk/Tools/msa/muscle>. Residues of LytM thought to be involved in Zn<sup>2+</sup> binding and catalysis are highlighted in red<sup>10</sup>. These residues are either altered or missing from EnvC and NlpD. Black and grey highlights indicate identical or similar amino residues, respectively. Asterisk mark stop codons following the carboxy-terminal amino acids. Sequences for *E. coli* NlpD, EnvC and *S. aureus* LytM are adapted from Uehara et al.<sup>10</sup>.

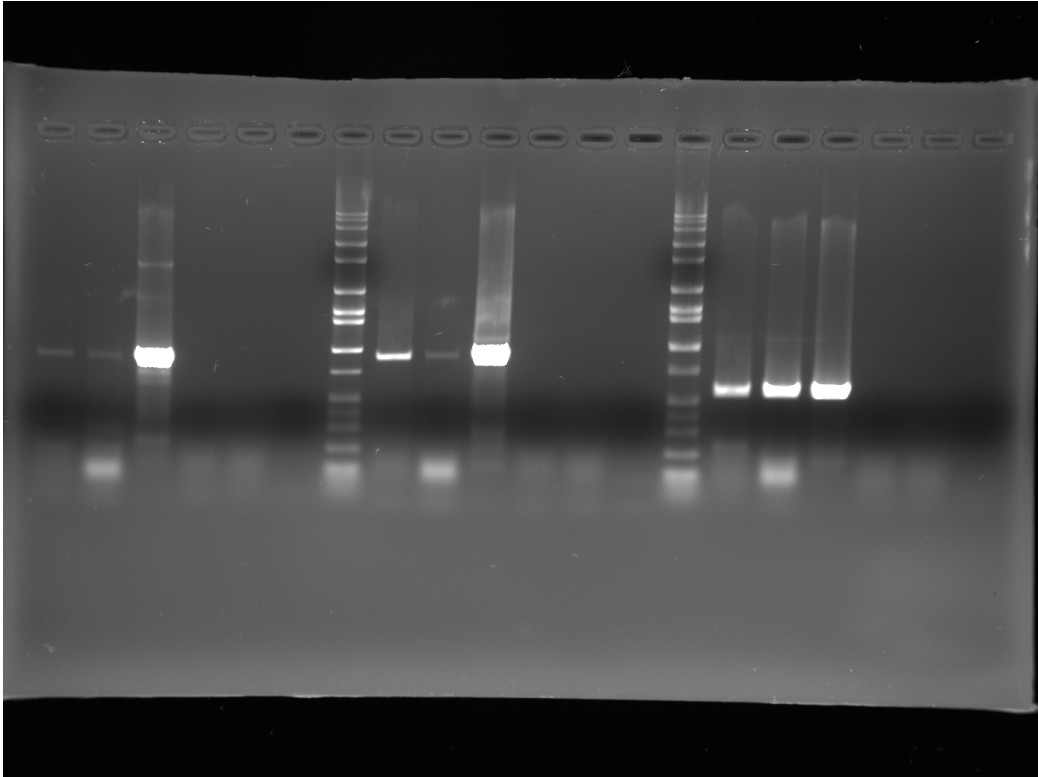

**Figure S5. Full size agarose gel of RT-PCR analysis of *nlpD1* and *penA* expression.** The inset shown in Figure 3(b) in the manuscript was derived from this picture of a 1.2 % agarose gel stained with ethidium bromide and imaged on a Bio-Rad ChemiDoc Imaging System. The resulting TIFF file was saved as a PDF and cropped to the desired size before being labeled in Powerpoint and inserted into composite Figure 3, which was assembled in Powerpoint. The darker area indicates loading dye.

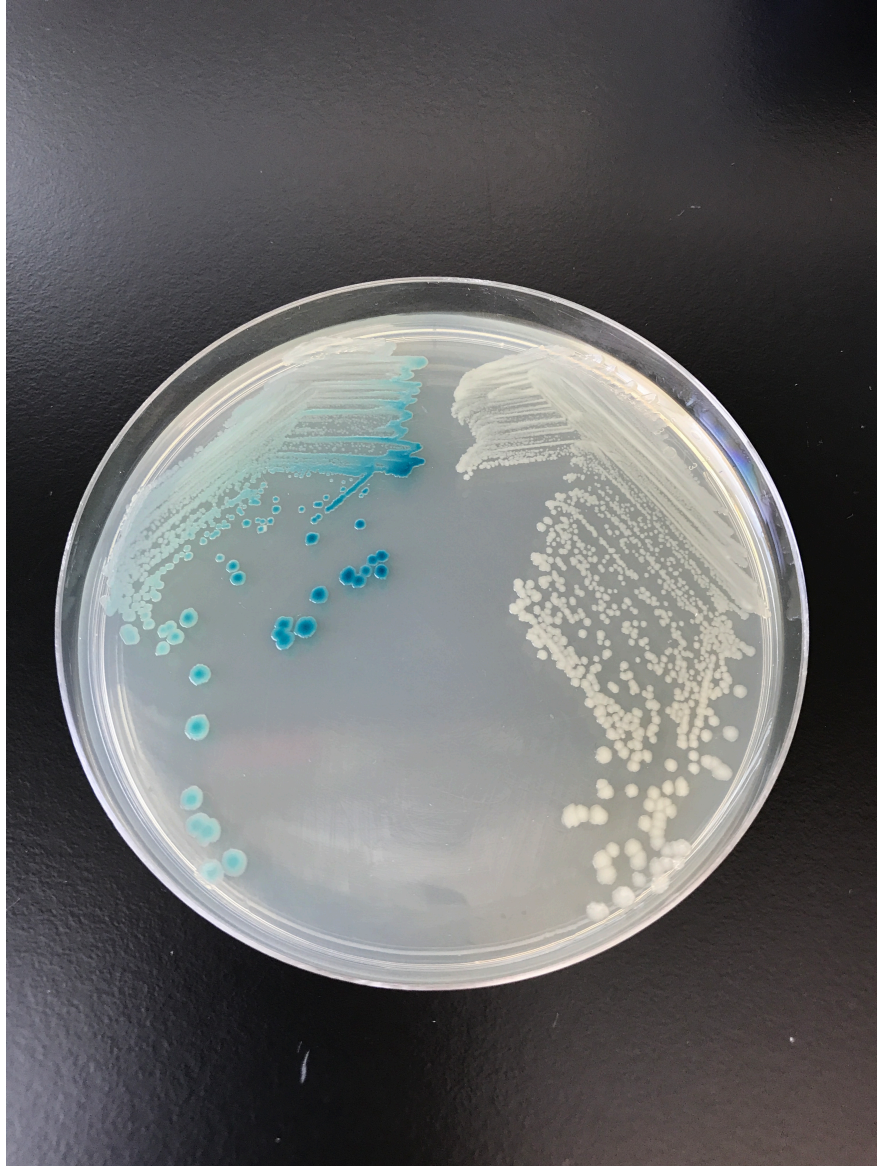

**Figure S6. Full size picture of *E. coli* strains on an agar plate containing  $\beta$ -galactosidase indicator.** The inset shown in Figure 4(c) in the manuscript was derived from this picture of colonies on an LB agar plate with  $\beta$ -galactosidase 5-bromo-4-chloro-3-indolyl- $\beta$ -D-galactopyranoside indicator substrate. The picture was taken with an iPhone 7 Plus. The picture JPEG file was saved as a PDF and cropped to the desired size before being labeled in Powerpoint and inserted into composite Figure 4, which was assembled in Powerpoint.



## References

1. Kumar, A. *et al.* Expression of resistance-nodulation-cell division efflux pumps in commonly used *Burkholderia pseudomallei* strains and clinical isolates from Northern Australia. *Trans. Roy. Soc. Trop. Med. Hyg.* **102/S1**, S145-S151 (2008).
2. Winsor, G. L. *et al.* The Burkholderia Genome Database: facilitating flexible queries and comparative analyses. *Bioinformatics* **24**, 2803-2804, doi:DOI 10.1093/bioinformatics/btn524 (2008).
3. Yi, H. *et al.* Twelve positions in a beta-lactamase that can expand its substrate spectrum with a single amino acid substitution. *PloS One* **7**, e37585, doi:10.1371/journal.pone.0037585 (2012).
4. Bugrysheva, J. V. *et al.* Antibiotic resistance markers in strain Bp1651 of *Burkholderia pseudomallei* Identified by genome sequence analysis. *Antimicrob. Agents Chemother.* doi:10.1128/AAC.00010-17 (2017).
5. Rholl, D. A. *et al.* Molecular investigations of PenA-mediated beta-lactam resistance in *Burkholderia pseudomallei*. *Front. Microbiol.* **2**, 139, doi:10.3389/fmicb.2011.00139 (2011).
6. Randall, L. B., Dobos, K., Papp-Wallace, K. M., Bonomo, R. A. & Schweizer, H. P. Membrane bound PenA beta-lactamase of *Burkholderia pseudomallei*. *Antimicrob. Agents Chemother.* **60**, 1509-1514, doi:10.1128/AAC.02444-15 (2016).
7. Ferrandez, Y. & Condemine, G. Novel mechanism of outer membrane targeting of proteins in Gram-negative bacteria. *Mol. Microbiol.* **69**, 1349-1357, doi:10.1111/j.1365-2958.2008.06366.x (2008).
8. Viarre, V. *et al.* HxcQ liposecretin is self-piloted to the outer membrane by its N-terminal lipid anchor. *J. Biol. Chem.* **284**, 33815-33823, doi:10.1074/jbc.M109.065938 (2009).
9. Tsang, M. J., Yakhnina, A. A. & Bernhardt, T. G. NlpD links cell wall remodeling and outer membrane invagination during cytokinesis in *Escherichia coli*. *PLoS Genet.* **13**, e1006888, doi:10.1371/journal.pgen.1006888 (2017).
10. Uehara, T., Parzych, K. R., Dinh, T. & Bernhardt, T. G. Daughter cell separation is controlled by cytokinetic ring-activated cell wall hydrolysis. *EMBO J.* **29**, 1412-1422, doi:10.1038/emboj.2010.36 (2010).
